# Supplementary material
Source: PubMed Central journal article supplement (PMC3509722)
Supplement: supp_139.24.4561_DEV087247.pdf [file supp_139.24.4561_DEV087247.pdf]

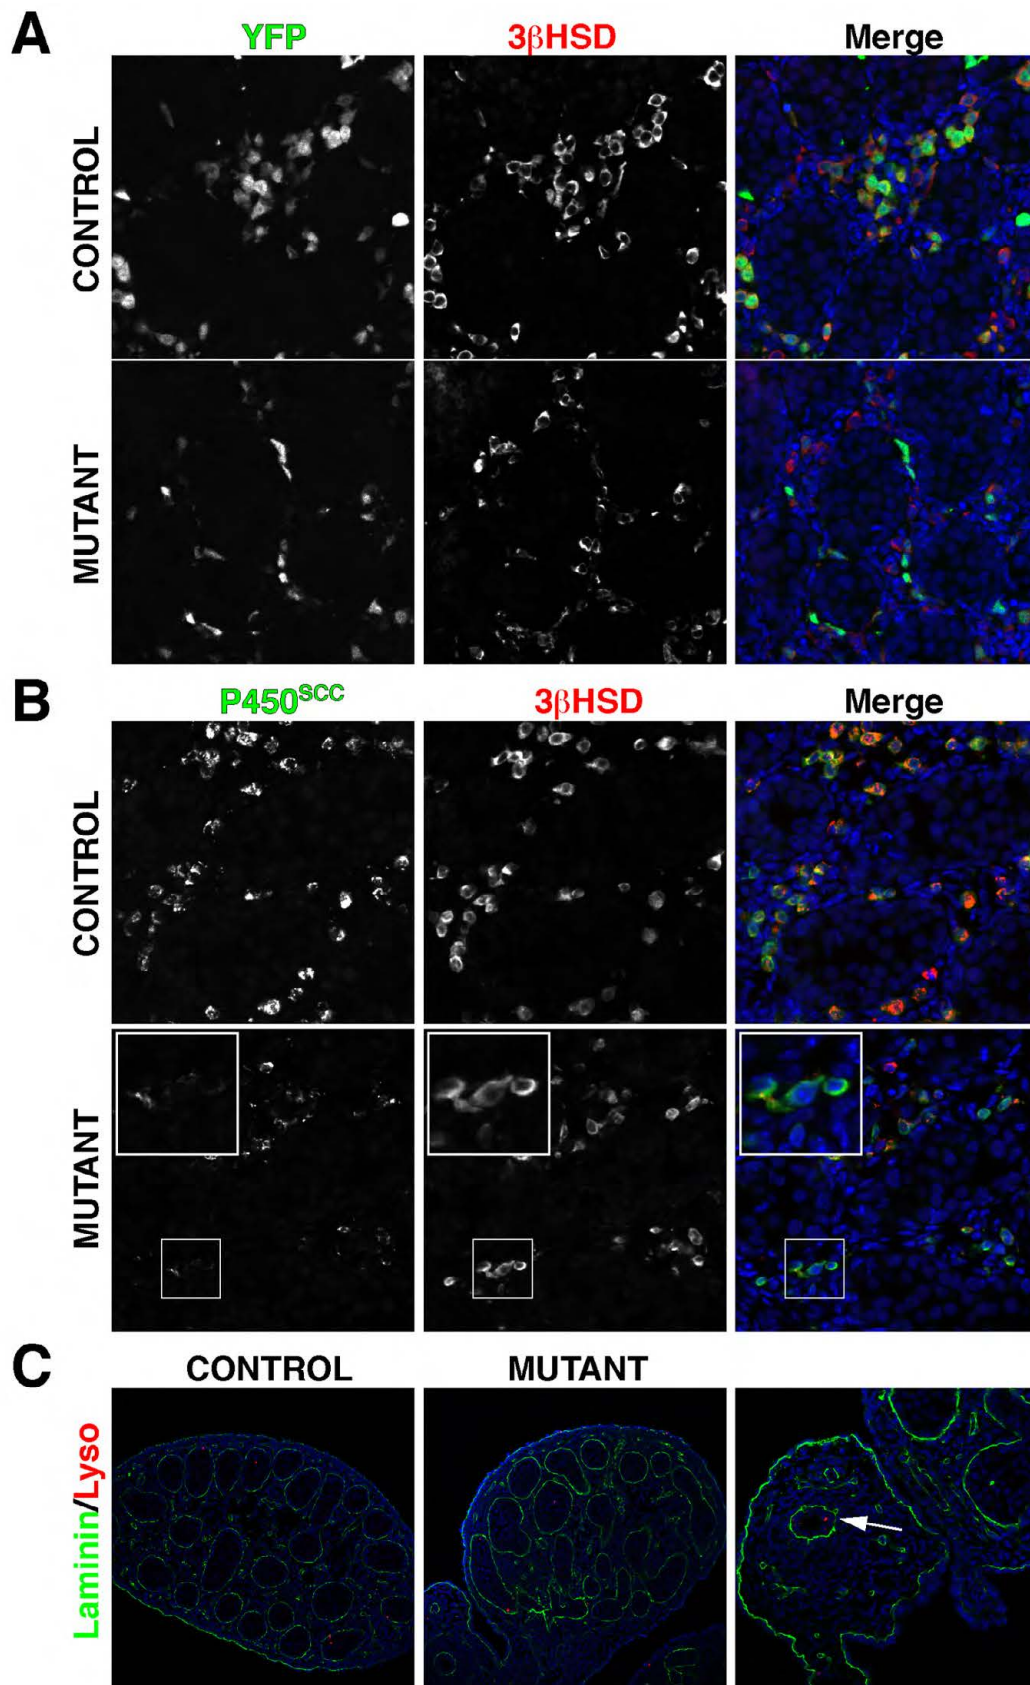

**Fig. S1. 3βHSD expression and cell death analysis in E14.5 foetal *Cyp11a1-Cre;Sf1<sup>F/F1</sup>* testes.** (A) Protein expression of YFP (green) and 3βHSD (red) as detected by co-immunofluorescence in control and mutant E14.5 testes. Interstitial YFP-positive cells in controls are always positive for 3βHSD. These cells exhibit YFP expression throughout the nuclear and cytoplasmic compartments with strong non-uniform endoplasmic reticulum-localized 3βHSD that is devoid from the nucleus. Mutant testes continue to express 3βHSD in a large number of cells. (B) Protein expression of P450<sup>SCC</sup> (green) and 3βHSD (red) in control and mutant E14.5 testes. Control interstitial P450<sup>SCC</sup> cells co-express 3βHSD whereas mutant Leydig cells exhibit a notable loss of P450<sup>SCC</sup> but continue to express high levels of 3βHSD (inset). (C) Apoptosis, detected by LysoTracker (red) is not altered in mutant foetal testes. Laminin (green) identifies the testis cords (left two panels) and control mesonephric ducts (far right panel) that are known to have cells undergoing apoptosis at this developmental time point (arrow).

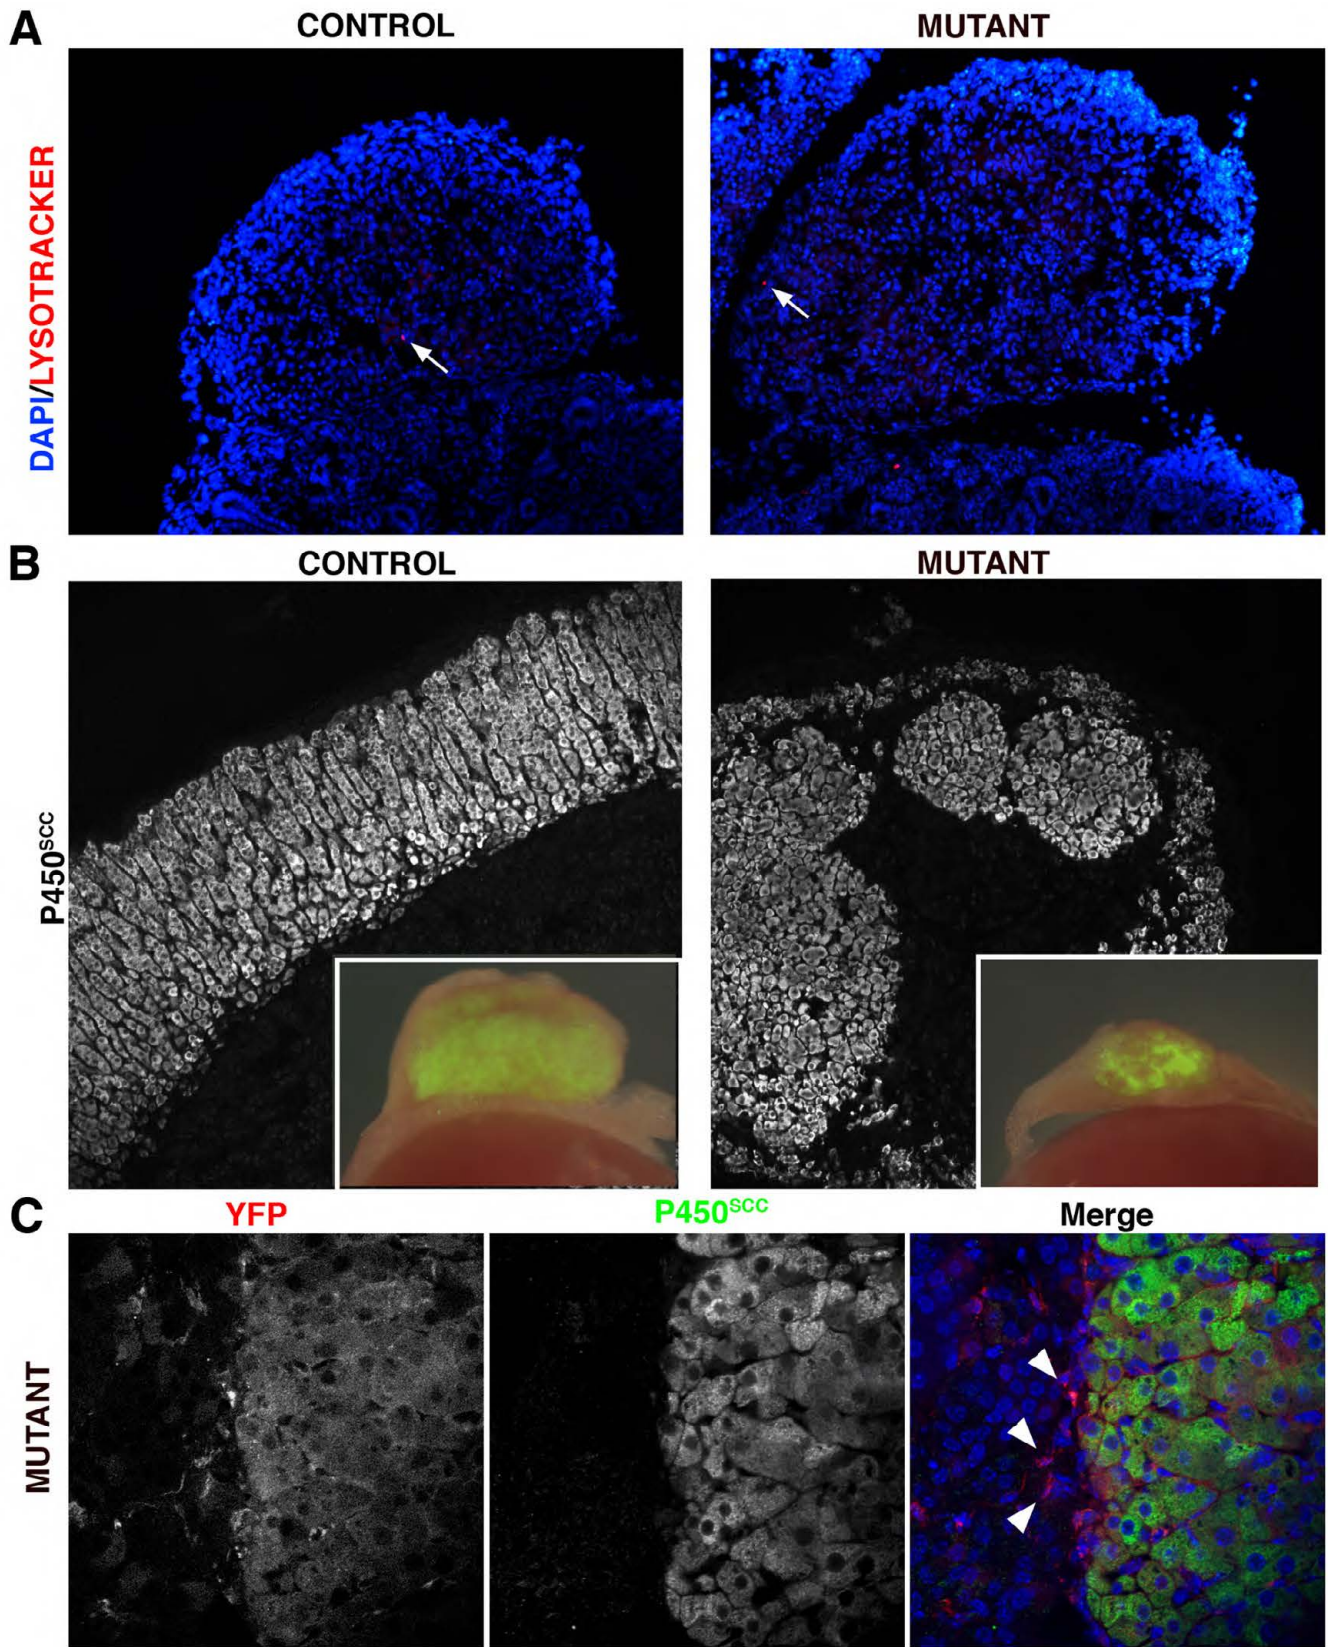

**Fig. S2. In-depth analysis of adrenal defects in *Cyp11a1-Cre;Sf1<sup>F/F1</sup>* mice.** (A) Apoptosis, detected by Lysotracker (red), is not altered in mutant adrenal glands compared with controls (arrows). (B) Most adult mutant adrenals appeared morphologically normal, and were indistinguishable from controls. However, a small number were hypoplastic and showed disorganization within the cortex, demonstrated both by immunofluorescence of P450<sup>SCC</sup> and by whole-mount analysis of YFP expression in freshly dissected glands (inset). (C) Double-fluorescence immunohistochemistry for YFP (red) and P450<sup>SCC</sup> (green) in adult adrenal glands. In female mutants, but never in controls, a population of YFP-positive, P450<sup>SCC</sup>-negative cells was present at the cortex-medulla boundary (arrowheads). This cell population exhibited a small, flat morphology.

**Table S1. qRT-PCR primer sequences**

| Gene name      | Forward primer (5'-3')     | Reverse primer (5'-3')       |
|----------------|----------------------------|------------------------------|
| <i>Cyp11a1</i> | AAAGACCGAATCGTCCTAAACC     | CTTGATGCGTCTGTGTAAGACT       |
| <i>Cyp17a1</i> | GATCTAAGAAGCGCTCAGGCA      | GGGCACTGCATCACGATAAA         |
| <i>Hsd3b1</i>  | CAGGCCTCCAATAGGTTCTG       | GTTGTCATCCACACTGCTGC         |
| <i>Sox9</i>    | AGTACCCGCATCTGCACAAC       | TACTTGTAATCGGGGTGGTCT        |
| <i>Lhcgr</i>   | TCAGGAATTTGCCGAAGAAAGAACAG | GAAGTCATAATCGTAATCCCAGCCACTG |
| <i>Ins13</i>   | TGGTCCTTGCTTACTGCGATCT     | CCTGGCTATGTCATTGCAACA        |
| <i>Hmgcs1</i>  | TTCAAAGGAAGTGACCCAGG       | GGTCTGATCCCCTTTGGTG          |
| <i>Rps2</i>    | CTGACTCCCGACCTCTGAAA       | GAGCCTGGGTCCTCTGAACA         |

**Table S2. Antibodies used in immunofluorescence studies**

| Antibody                     | Supplier                                                                                                 | Method | Working dilution |
|------------------------------|----------------------------------------------------------------------------------------------------------|--------|------------------|
| 3 $\beta$ -HSD (rabbit)      | Generous gift, Prof. Ian Mason<br>(University of Edinburgh MRC<br>Centre for Reproductive Health,<br>UK) | IF-TSA | 1/2000           |
| AR (rabbit)                  | Millipore, 06-680                                                                                        | IF-TSA | 1/250            |
| c-Kit (rabbit)               | Cell Signaling, 3074                                                                                     | IF     | 1/200            |
| GFP (rabbit)                 | Invitrogen, A6455                                                                                        | IF     | 1/500            |
|                              |                                                                                                          | IF-TSA | 1/2000           |
| Ki67 (rat)                   | Dako, M7249                                                                                              | IF     | 1/25             |
|                              |                                                                                                          | IF-TSA | 1/200            |
| Laminin (rabbit)             | Sigma, L9393                                                                                             | IF     | 1/400            |
| LIFR (rabbit)                | Santa Cruz, sc-659                                                                                       | IF     | 1/100            |
| P450 <sup>SCC</sup> (rabbit) | Millipore, AB1244                                                                                        | IF     | 1/200            |
|                              |                                                                                                          | IF-TSA | 1/1000           |
| p-S6 (rabbit)                | Cell Signaling, 4857                                                                                     | IF-TSA | 1/500            |
| PECAM (rat)                  | BD Pharmingen, 553370                                                                                    | IF     | 1/50             |
| SF-1 (rabbit)                | Generous gift, Prof. Ken<br>Morohashi (Kyushu University,<br>Japan)                                      | IF     | 1/200            |
|                              |                                                                                                          | IF-TSA | 1/2000           |
| SMA (mouse)                  | Generous gift, Dr David<br>Robertson (Breakthrough Toby<br>Robins Breast Cancer Centre,<br>London, UK)   | IF     | 1/4000           |

IF, immunofluorescence performed using a fluorescently labelled secondary antibody;  
F-TSA, immunofluorescence performed using the TSA system.
